# Supplementary material for: Nanoporous polystyrene–porphyrin nanoparticles for selective gas separation
Source: Royal Society of Chemistry journal article supplement (doi:10.1039/c6py00296j), 2016-01-01
Supplement: c6py00296j1.pdf [file c6py00296j1.pdf]

## Nanoporous Polystyrene-Porphyrin Nanoparticles for Selective Gas Separation

Ch. Flouraki, M. Kaliva, I. T. Papadas, G. S. Armatas and M. Vamvakaki

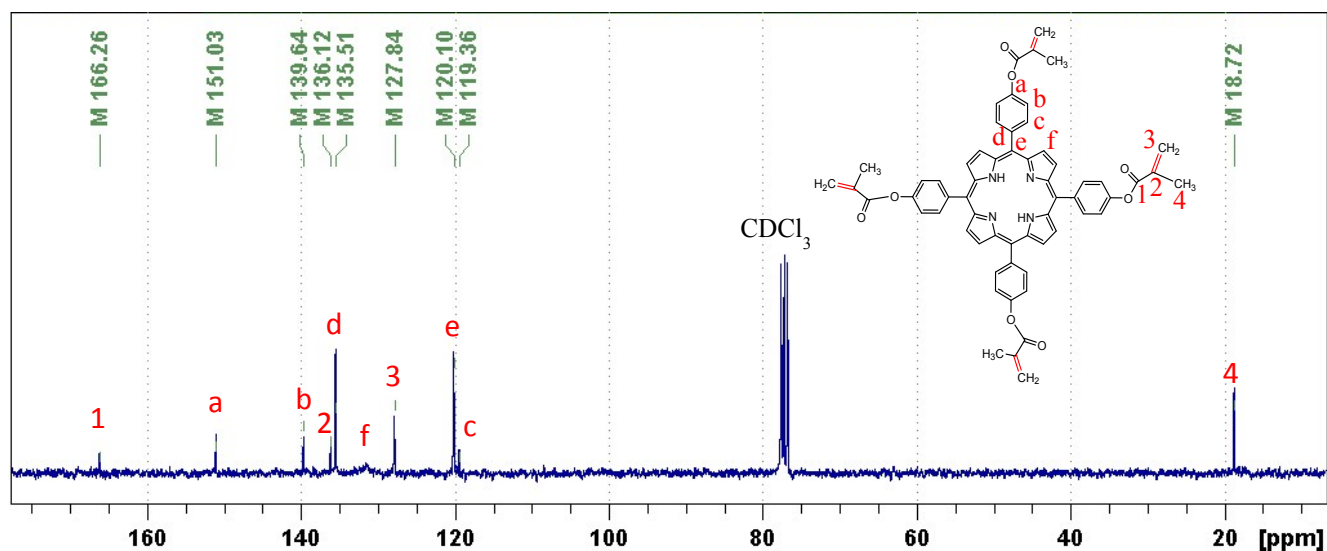

Figure S1.  $^{13}\text{C}$ -NMR of tetra-methacrylate porphyrin cross-linker in  $\text{CDCl}_3$

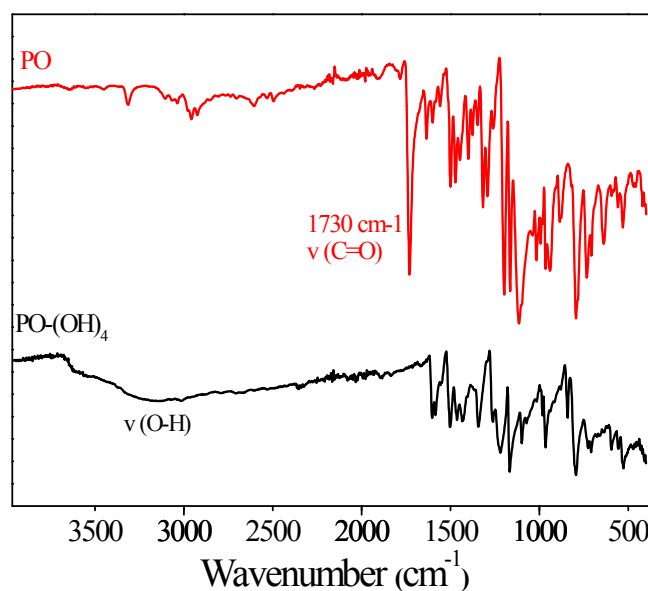

Figure S2. ATR-FTIR spectrum of  $\text{PO}-(\text{OH})_4$  (black line) and PO (red line).

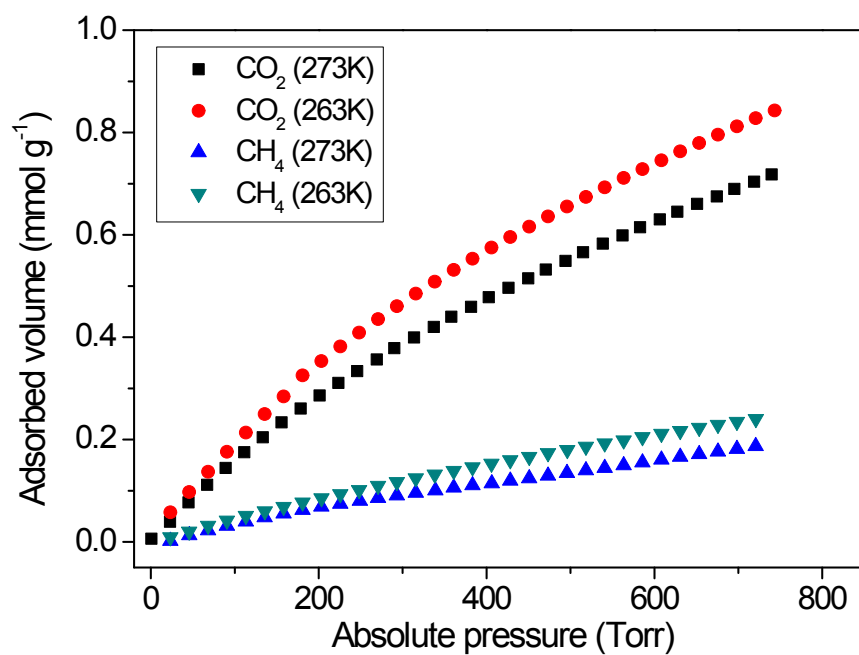

**Figure S3.** Adsorption isotherms for CO<sub>2</sub> at 263 K (●) and 273 K (■) and CH<sub>4</sub> at 263 K (▼) and 273 K (▲) for PO-St-DVB(2).
